# Supplementary material for: Pathway-Based Kernel Boosting for the Analysis of Genome-Wide Association Studies
Source: Comput Math Methods Med. 2017 Jul 13;2017:6742763. doi: 10.1155/2017/6742763 (PMC5530424; doi:10.1155/2017/6742763)
Supplement: Supplementary file 2 [file 6742763.f2.zip]

Archive with 8 entries (8 files):
- genotype.data.Rda
- Kernel_Boosting_example_code.R
- list.of.pathways.Rda
- pathway.info.Rda
- phenotype.data.Rda
- README_SUPPLEMENTAL_CODE.txt
- snp.info.Rda
- snps.Rda
